# Supplementary material
Source: PubMed Central journal article supplement (PMC3592963)
Supplement: 11357_2011_9373_MOESM2_ESM.pdf [file 11357_2011_9373_MOESM2_ESM.pdf]

**Evidence from Case-control and Longitudinal Studies Supports Associations of Genetic Variation in *APOE*, *CETP* and *IL6* with Human Longevity**

AGE

Mette Soerensen<sup>\*</sup>, Serena Dato, Qihua Tan, Mikael Thinggaard, Rabea Kleindorp, Marian Beekman, H. Eka D. Suchiman, Rune Jacobsen, Matt McGue, Tinna Stevnsner, Vilhelm A. Bohr, Anton J.M. de Craen, Rudi G.J. Westendorp, Stefan Schreiber, Eline Slagboom, Almut Nebel, James W. Vaupel, Kaare Christensen and Lene Christiansen

<sup>\*</sup>Author for correspondence: Mette Soerensen, msoerensen@health.sdu.dk, The Danish Aging Research Center, Epidemiology, Institute of Public Health, University of Southern Denmark, J.B. Winsloews Vej 9B, 5000 Odense C, Denmark and Department of Clinical Genetics and Department of Clinical Biochemistry and Pharmacology, Odense University Hospital, Sdr. Boulevard 29, 5000 Odense C, Denmark

**Supplementary Table 1: The 102 SNPs in the 16 candidate genes investigated.**

| Gene         | No. of SNPs | SNPs                                                                                                                                                                                               |
|--------------|-------------|----------------------------------------------------------------------------------------------------------------------------------------------------------------------------------------------------|
| ACE          | 11          | rs1055086 rs1800764 rs4291 rs4295 rs4309 rs4311 rs4331 rs4335 rs4343 rs4344 rs4351                                                                                                                 |
| APOA4        | 1           | rs2849174                                                                                                                                                                                          |
| APOC3        | 2           | rs5128 rs595049                                                                                                                                                                                    |
| APOE         | 3           | rs405509 rs440446 rs769449                                                                                                                                                                         |
| CETP         | 20          | rs11076175 rs12708967 rs12708974 rs1800774 rs1800775 rs1800777 rs1801706 rs289714 rs289742 rs3764261 rs4783961 rs4783962 rs4784744 rs5882 rs5883 rs6499863 rs7205804 rs9923854 rs9929488 rs9930761 |
| HFE          | 6           | rs1572982 rs1800708 rs2858993 rs707889 rs9295687 rs9379825                                                                                                                                         |
| HSPA1L       | 4           | rs2075799 rs2075800 rs2227955 rs2227956                                                                                                                                                            |
| HSPA1A       | 1           | rs1043618                                                                                                                                                                                          |
| HSPA14       | 6           | rs10906772 rs12770830 rs17155992 rs17268499 rs7905174 rs9787671                                                                                                                                    |
| IL6          | 2           | rs12700386 rs2069827                                                                                                                                                                               |
| IL6R         | 8           | rs12083537 rs2229238 rs4075015 rs4240872 rs4601580 rs4845626 rs6684439 rs6689393                                                                                                                   |
| MTHFR        | 13          | rs11121832 rs12121543 rs1476413 rs17037390 rs17421462 rs1801131 rs1801133 rs2066471 rs3737964 rs3737967 rs4846048 rs4846052 rs9651118                                                              |
| SIRT1        | 5           | rs12778366 rs2236319 rs2273773 rs3758391 rs3818291                                                                                                                                                 |
| SIRT3        | 10          | rs1023430 rs11246009 rs11246020 rs12226697 rs3782116 rs3825075 rs4758633 rs535716 rs536715 rs7104764                                                                                               |
| SIRT6        | 3           | rs107251 rs352492 rs7260071                                                                                                                                                                        |
| TGFB1        | 7           | rs11466321 rs11466338 rs11466359 rs1800469 rs4803455 rs8105161 rs8110090                                                                                                                           |
| <b>Total</b> | 102         |                                                                                                                                                                                                    |
