# Supplementary material
Source: PubMed Central journal article supplement (PMC3592963)
Supplement: 11357_2011_9373_MOESM3_ESM.pdf [file 11357_2011_9373_MOESM3_ESM.pdf]

**Evidence from Case-control and Longitudinal Studies Supports Associations of Genetic Variation in *APOE*, *CETP* and *IL6* with Human Longevity**

AGE

Mette Soerensen<sup>\*</sup>, Serena Dato, Qihua Tan, Mikael Thinggaard, Rabea Kleindorp, Marian Beekman, H. Eka D. Suchiman, Rune Jacobsen, Matt McGue, Tinna Stevnsner, Vilhelm A. Bohr, Anton J.M. de Craen, Rudi G.J. Westendorp, Stefan Schreiber, Eline Slagboom, Almut Nebel, James W. Vaupel, Kaare Christensen and Lene Christiansen

\*Author for correspondence: Mette Soerensen, msoerensen@health.sdu.dk, The Danish Aging Research Center, Epidemiology, Institute of Public Health, University of Southern Denmark, J.B. Winsloews Vej 9B, 5000 Odense C, Denmark and Department of Clinical Genetics and Department of Clinical Biochemistry and Pharmacology, Odense University Hospital, Sdr. Boulevard 29, 5000 Odense C, Denmark

**Supplementary Table 2:** Allele frequency case-control comparisons of middle-aged and oldest-old Danish individuals (both genders combined).

| Gene                | SNPs genotyped | p<0.05 | p<0.01 | p<0.005 | p<0.001 |
|---------------------|----------------|--------|--------|---------|---------|
| <i>CETP</i>         | 20             | 6      | 0      | 1       | 1       |
| <i>APOE</i>         | 3              | 2      | 0      | 1       | 0       |
| <i>HSPA14</i>       | 6              | 4      | 1      | 2       | 0       |
| <i>SIRT6</i>        | 3              | 1      | 0      | 1       | 0       |
| <i>TGFB1</i>        | 7              | 2      | 0      | 0       | 0       |
| 11 additional genes | 63             | 0      | 0      | 0       | 0       |
| Observed            | 102            | 15     | 1      | 5       | 1       |
| Expected            |                | 5.1    | 1.02   | 0.51    | 0.10    |
