# Supplementary material
Source: PubMed Central journal article supplement (PMC3592963)
Supplement: 11357_2011_9373_MOESM4_ESM.pdf [file 11357_2011_9373_MOESM4_ESM.pdf]

**Evidence from Case-control and Longitudinal Studies Supports Associations of Genetic Variation in *APOE*, *CETP* and *IL6* with Human Longevity**

AGE

Mette Soerensen<sup>\*</sup>, Serena Dato, Qihua Tan, Mikael Thinggaard, Rabea Kleindorp, Marian Beekman, H. Eka D. Suchiman, Rune Jacobsen, Matt McGue, Tinna Stevnsner, Vilhelm A. Bohr, Anton J.M. de Craen, Rudi G.J. Westendorp, Stefan Schreiber, Eline Slagboom, Almut Nebel, James W. Vaupel, Kaare Christensen and Lene Christiansen

\*Author for correspondence: Mette Soerensen, msoerensen@health.sdu.dk, The Danish Aging Research Center, Epidemiology, Institute of Public Health, University of Southern Denmark, J.B. Winsloews Vej 9B, 5000 Odense C, Denmark and Department of Clinical Genetics and Department of Clinical Biochemistry and Pharmacology, Odense University Hospital, Sdr. Boulevard 29, 5000 Odense C, Denmark

**Supplementary Table 3: Sex-stratified cross sectional analysis.**

| Gene | SNP       | Minor/Major allele | Chr./position | Position in gene | Gender  | MAF MADT/1905 | PCCA uncorrected     | PCCA corrected | OR (95% CI)          | PCCG uncorrected              | PCCG corrected | Change in freq. of common homozygotes from middle aged to old aged |
|------|-----------|--------------------|---------------|------------------|---------|---------------|----------------------|----------------|----------------------|-------------------------------|----------------|--------------------------------------------------------------------|
| CETP | rs9923854 | C/A                | 16/55574503   | Intronic         | Males   | 0.085/0.165   | $9.14 \cdot 10^{-6}$ | <b>0.0006</b>  | 2.117 (1.512-2.964)  | $1.71 \cdot 10^{-6} \ddagger$ | <b>0.0003</b>  | ↓                                                                  |
|      |           |                    |               |                  | Females | 0.098/0.164   | $3.08 \cdot 10^{-5}$ | <b>0.0025</b>  | 1.804 (1.363- 2.389) | $2.94 \cdot 10^{-6} \ddagger$ | <b>0.0007</b>  | ↓                                                                  |
| APOE | rs769449  | A/G                | 19/50101842   | Intronic         | Males   | 0.179/0.129   | 0.010                | >0.05          | 0.676 (0.500-0.915)  | 0.009                         | >0.05          | ↑                                                                  |
|      |           |                    |               |                  | Females | 0.154/0.110   | 0.020                | >0.05          | 0.753 (0.584-0.973)  | 0.031                         | >0.05          | ↑                                                                  |

Notes: Chr: chromosome, MAF: minor allele frequency, MADT: the Study of Middle Aged Danish Twins, 1905: the 1905 cohort, PCCA = Allelic case-control comparison P-value, OR: odds ratio and 95% CI: 95% confidence interval, PCCG: genotypic case-control comparison P-value,  $\ddagger$ : applying a dominant model, Freq: frequency, PCCA or PCCG values being significant after correction of multiple testing is shown in bold.
