# Supplementary material
Source: PubMed Central journal article supplement (PMC3592963)
Supplement: 11357_2011_9373_MOESM5_ESM.pdf [file 11357_2011_9373_MOESM5_ESM.pdf]

**Evidence from Case-control and Longitudinal Studies Supports Associations of Genetic Variation in *APOE*, *CETP* and *IL6* with Human Longevity**

AGE

Mette Soerensen\*, Serena Dato, Qihua Tan, Mikael Thinggaard, Rabea Kleindorp, Marian Beekman, H. Eka D. Suchiman, Rune Jacobsen, Matt McGue, Tinna Stevnsner, Vilhelm A. Bohr, Anton J.M. de Craen, Rudi G.J. Westendorp, Stefan Schreiber, Eline Slagboom, Almut Nebel, James W. Vaupel, Kaare Christensen and Lene Christiansen

\*Author for correspondence: Mette Soerensen, msoerensen@health.sdu.dk, The Danish Aging Research Center, Epidemiology, Institute of Public Health, University of Southern Denmark, J.B. Winsloews Vej 9B, 5000 Odense C, Denmark and Department of Clinical Genetics and Department of Clinical Biochemistry and Pharmacology, Odense University Hospital, Sdr. Boulevard 29, 5000 Odense C, Denmark

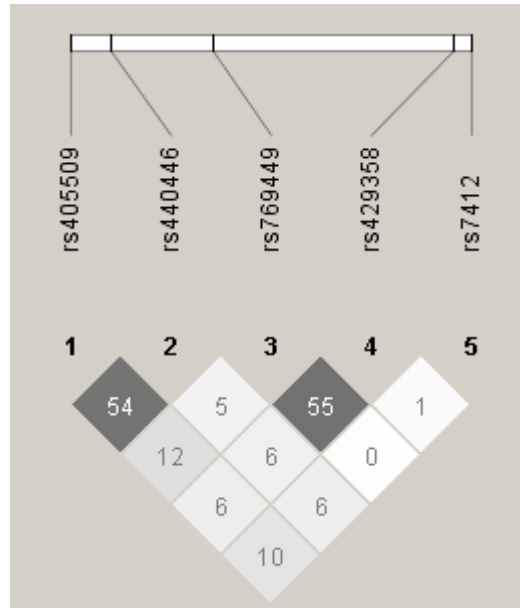

**Supplementary figure 1:** Linkage disequilibrium plot of *APOE* based on genotype data on rs405509, rs440446 and rs769449 (investigated in the study presented here) and *APOE*  $\epsilon$  (rs429358 and rs7412) from previous studies (N = 1270). Numbers in the figure depicts  $R^2$ .
